# Supplementary material for: Evaluation of a Probability-Based Predictive Tool on Pathologist Agreement Using Urinary Bladder as a Pilot Tissue
Source: MDPI journal article supplement (doi:10.3390/vetsci9070367), 2022-07-18
Supplement: s1 [file s1]

**Supplementary Table S1:** Diagnoses for every digital slide with the reference diagnosis, grouped by pathologist (P1-P4), under three different conditions (First, History and Tool).

| Species | P1    |                  |                  | P2    |      |                  | P3    |     |                  | P4    |     |                  | Reference diagnosis                                                                        |
|---------|-------|------------------|------------------|-------|------|------------------|-------|-----|------------------|-------|-----|------------------|--------------------------------------------------------------------------------------------|
|         | First | Hx               | Tool             | First | Hx   | Tool             | First | Hx  | Tool             | First | Hx  | Tool             |                                                                                            |
| Canine  | Neo   | Neo              | Neo              | Neo   | Neo  | Neo              | Neo   | Neo | Neo              | Neo   | Neo | Neo              | Neoplasia - UC                                                                             |
| Feline  | Neo   | Neo              | Neo              | Neo   | Neo  | Neo              | Neo   | Neo | Neo              | .     | .   | .                | Neoplasia - UC                                                                             |
| Canine  | Neo   | Neo              | Neo              | Cys   | Cys  | Cys              | Uro   | Uro | Uro              | .     | .   | .                | Neoplasia - UC                                                                             |
| Feline  | Neo   | Neo              | Neo              | Neo   | Neo  | Neo              | Neo   | Neo | Neo              | Neo   | Neo | Neo              | Neoplasia - UC                                                                             |
| Canine  | Cys   | Cys              | Cys              | Cys   | Cys  | Cys              | Cys   | Cys | Cys              | .     | .   | .                | Cystitis, mild                                                                             |
| Feline  | Cys   | Cys              | Cys              | Cys   | Cys  | Cys              | Cys   | Cys | Cys              | Cys   | Cys | Cys              | Cystitis secondary to lower motor neuron bladder                                           |
| Canine  | Cys   | Cys              | Cys              | Cys   | Cys  | Cys              | Cys   | Uro | Uro              | Uro   | Uro | Uro              | Urolithiasis - Cystitis + uroliths at necropsy                                             |
| Canine  | Cys   | Cys              | Oth <sup>b</sup> | Oth   | Oth  | Oth              | Cys   | Cys | Cys <sup>d</sup> | Neo   | Neo | Neo              | Neoplasia - Leiomyosarcoma                                                                 |
| Canine  | Uro   | Uro              | Uro              | Cys   | Cys  | Cys              | Cys   | Uro | Uro              | Uro   | Uro | Uro              | Urolithiasis - Cystitis + stones removed surgically                                        |
| Feline  | Uro   | Uro              | Uro <sup>a</sup> | Cys   | Cys  | Cys              | Cys   | Uro | Uro              | Oth   | Oth | Oth <sup>l</sup> | Cystitis, suspect FIC - urethral obstruction, no uroliths at necropsy                      |
| Feline  | Uro   | Uro              | Uro <sup>a</sup> | Cys   | Cys  | Cys              | Cys   | Cys | Cys              | Oth   | Oth | Oth <sup>l</sup> | Cystitis, suspect FIC - clinical signs of stranguria. No stones or obstruction at necropsy |
| Feline  | Uro   | Uro <sup>a</sup> | Cys              | Cys   | Cys  | Cys              | Cys   | Cys | Cys              | Cys   | Cys | Cys              | Cystitis, suspect FIC - clinical urethral obstruction, no uroliths at necropsy             |
| Canine  | Cys   | Cys              | Cys              | Cys   | Cys  | Cys              | Cys   | Cys | Cys              | Cys   | Cys | Cys              | Cystitis                                                                                   |
| Canine  | Norm  | Norm             | Norm             | Norm  | Norm | Norm             | Cys   | Cys | Cys              | .     | .   | .                | Normal                                                                                     |
| Feline  | Norm  | Norm             | Norm             | Oth   | Oth  | Oth <sup>f</sup> | Cys   | Cys | Cys <sup>d</sup> | .     | .   | .                | Neoplasia - Epitheliotropic lymphoma (metastasis)                                          |

|        |      |      |                  |      |      |                  |                  |      |                  |      |      |      |                                                                                |
|--------|------|------|------------------|------|------|------------------|------------------|------|------------------|------|------|------|--------------------------------------------------------------------------------|
| Canine | Norm | Norm | Norm             | Norm | Norm | Norm             | Cys              | Cys  | Cys <sup>d</sup> | Norm | Norm | Norm | Normal                                                                         |
| Canine | Norm | Norm | Norm             | Oth  | Oth  | Oth <sup>g</sup> | Oth              | Oth  | Oth <sup>k</sup> | Oth  | Norm | Norm | Normal                                                                         |
| Canine | Cys  | Norm | Cys <sup>c</sup> | Oth  | Oth  | Oth <sup>g</sup> | Cys              | Cys  | Cys              | .    | .    | .    | Normal                                                                         |
| Feline | Uro  | Uro  | Uro <sup>a</sup> | Neo  | Neo  | Neo              | Cys              | Uro  | Uro              | Cys  | Uro  | Uro  | Urolithiasis - Urethral obstruction and bladder rupture, uroliths at necropsy. |
| Feline | Cys  | Cys  | Cys <sup>d</sup> | Cys  | Cys  | Cys              | Norm             | Norm | Norm             | Cys  | Norm | Norm | Normal                                                                         |
| Feline | Norm | Norm | Norm             | Oth  | Oth  | Oth <sup>h</sup> | Norm             | Norm | Norm             | Uro  | Norm | Norm | Normal                                                                         |
| Feline | Uro  | Uro  | Oth <sup>e</sup> | Cys  | Cys  | Cys <sup>i</sup> | Cys              | Cys  | Cys <sup>d</sup> | Uro  | Uro  | Uro  | Urolithiasis (cystotomy) + UTI (positive culture)                              |
| Canine | Uro  | Uro  | Uro              | Cys  | Cys  | Cys <sup>i</sup> | Oth <sup>j</sup> | Uro  | Uro              | Uro  | Uro  | Uro  | Urolithiasis                                                                   |
| Feline | Uro  | Uro  | Uro              | Cys  | Cys  | Cys              | Cys              | Uro  | Uro              | Uro  | .    | .    | Cystitis, suspect FIC - clinical urethral obstruction, no uroliths at necropsy |
| Canine | Uro  | Uro  | Uro              | Cys  | Cys  | Cys              | Cys              | Uro  | Uro              | Cys  | .    | .    | Urolithiasis + UTI                                                             |

Key: First = First read of the slide, with no animal information; Hx = Second read of the slide, with animal signalment and clinical history; Tool = Third read of the slide, with the predictive tool.

Cys = Cystitis; FIC = Feline idiopathic cystitis; Neo = Neoplasia; Norm = Normal; Oth = Other diagnosis; UC = Urothelial carcinoma; Uro = Urolithiasis. Full stop indicates slides that were unable to be assessed due to technical issues.

Comments from the pathologists: <sup>a</sup> Suspected FIC cases, called these urolithiasis as many have plugs that act similarly to stones; <sup>b</sup> Polypoid cystitis, mild inflammation, secondary to stones; <sup>c</sup> Follicular cystitis; <sup>d</sup> Normal/minimal clinically insignificant cystitis; <sup>e</sup> Marked hemorrhage; <sup>f</sup> Urothelial hyperplasia with glandular metaplasia; <sup>g</sup> Urothelial hyperplasia; <sup>h</sup> Focal mucosal ulceration, intraluminal hemorrhage; <sup>i</sup> Obstruction/uroliths?; <sup>j</sup> Poorly scanned, had trouble evaluating; <sup>k</sup> Myositis; <sup>l</sup> Mucosal hemorrhage and necrosis.

**Supplementary Table S2:** The sensitivity and specificity of the diagnosis by the four pathologists under the various slide reading conditions, and digital versus glass slides.

|                                      | Reference Diagnosis |           |        |              |
|--------------------------------------|---------------------|-----------|--------|--------------|
|                                      | Cystitis            | Neoplasia | Normal | Urolithiasis |
| <b>All data</b>                      |                     |           |        |              |
| Sensitivity                          | 0.696               | 0.648     | 0.564  | 0.500        |
| Specificity                          | 0.695               | 0.976     | 0.978  | 0.801        |
| <b>No animal information</b>         |                     |           |        |              |
| Sensitivity                          | 0.696               | 0.583     | 0.511  | 0.383        |
| Specificity                          | 0.654               | 0.98      | 0.978  | 0.763        |
| <b>Signalment and history</b>        |                     |           |        |              |
| Sensitivity                          | 0.643               | 0.639     | 0.596  | 0.562        |
| Specificity                          | 0.718               | 0.980     | 0.971  | 0.791        |
| <b>Predictive tool probabilities</b> |                     |           |        |              |
| Sensitivity                          | 0.750               | 0.727     | 0.587  | 0.553        |
| Specificity                          | 0.714               | 0.966     | 0.985  | 0.852        |
| <b>Glass</b>                         |                     |           |        |              |
| Sensitivity                          | 0.774               | 0.778     | 0.597  | 0.417        |
| Specificity                          | 0.650               | 0.974     | 0.995  | 0.854        |
| <b>Digital</b>                       |                     |           |        |              |
| Sensitivity                          | 0.619               | 0.580     | 0.529  | 0.586        |
| Specificity                          | 0.734               | 0.977     | 0.964  | 0.756        |

The sensitivity and specificity of the diagnostic approaches used by the four test pathologists is presented in **Error! Reference source not found.** Overall, a diagnosis of cystitis had the highest sensitivity (69.6 %) but lowest specificity (69.5 %) of all the diagnoses. The sensitivity of diagnosing urolithiasis was unsurprisingly highly influenced by the additional of clinical history. When comparing glass slides to digital slide images, cystitis diagnosis had higher sensitivity and lower specificity with glass slides; neoplasia had a higher sensitivity and comparable specificity; normal had higher sensitivity and specificity with glass slides; and the urolithiasis diagnosis had lower sensitivity but higher specificity when using glass slides compared to digital slide images.

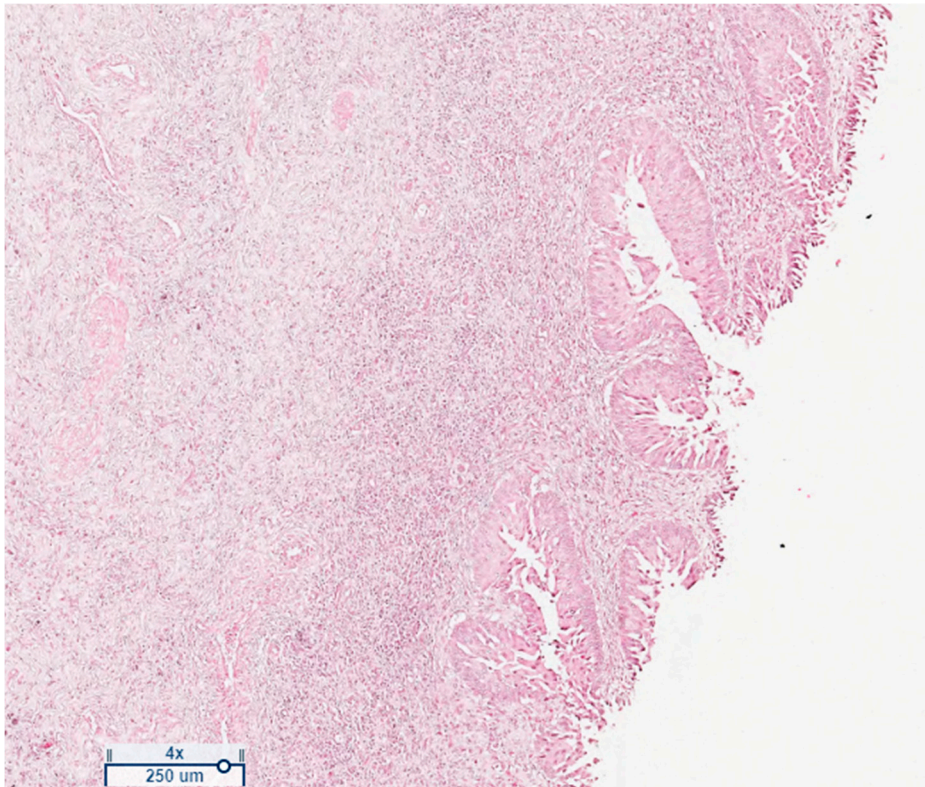

Supplementary Figure S1: A case of cystitis in a cat from the whole slide image case library (40x magnification).

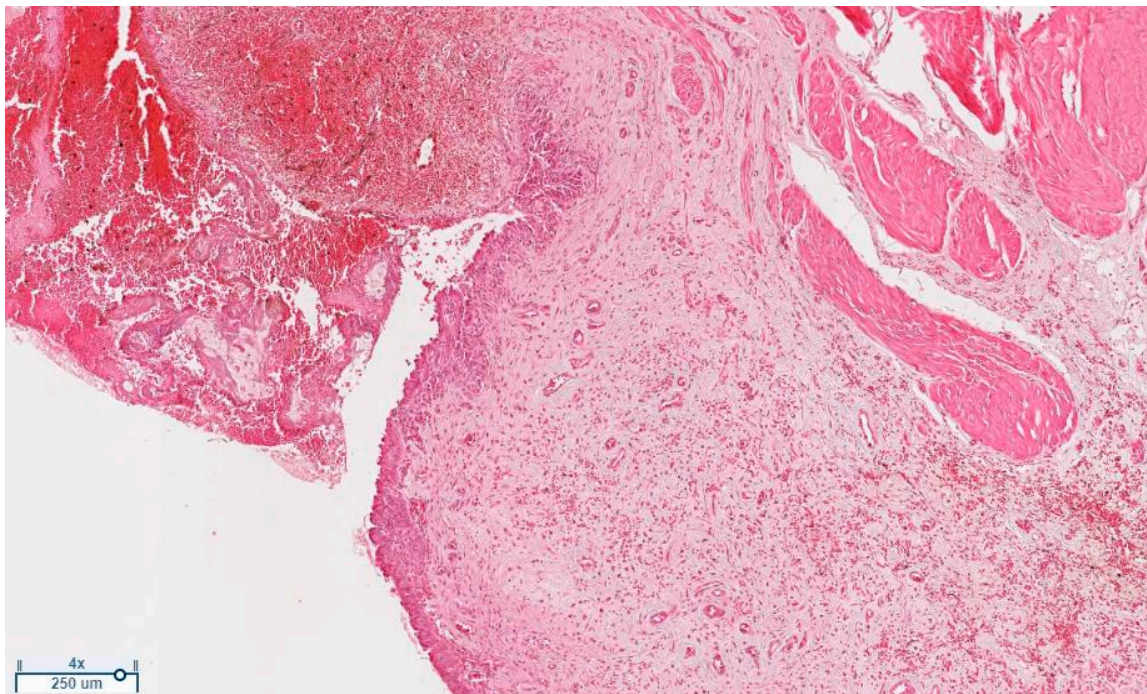

Supplementary Figure S2: A case of urolithiasis in a dog from the whole slide image case library. This slide exhibits the typical histological features of urolithiasis – urothelial ulceration and submucosal haemorrhage and oedema (40x magnification).



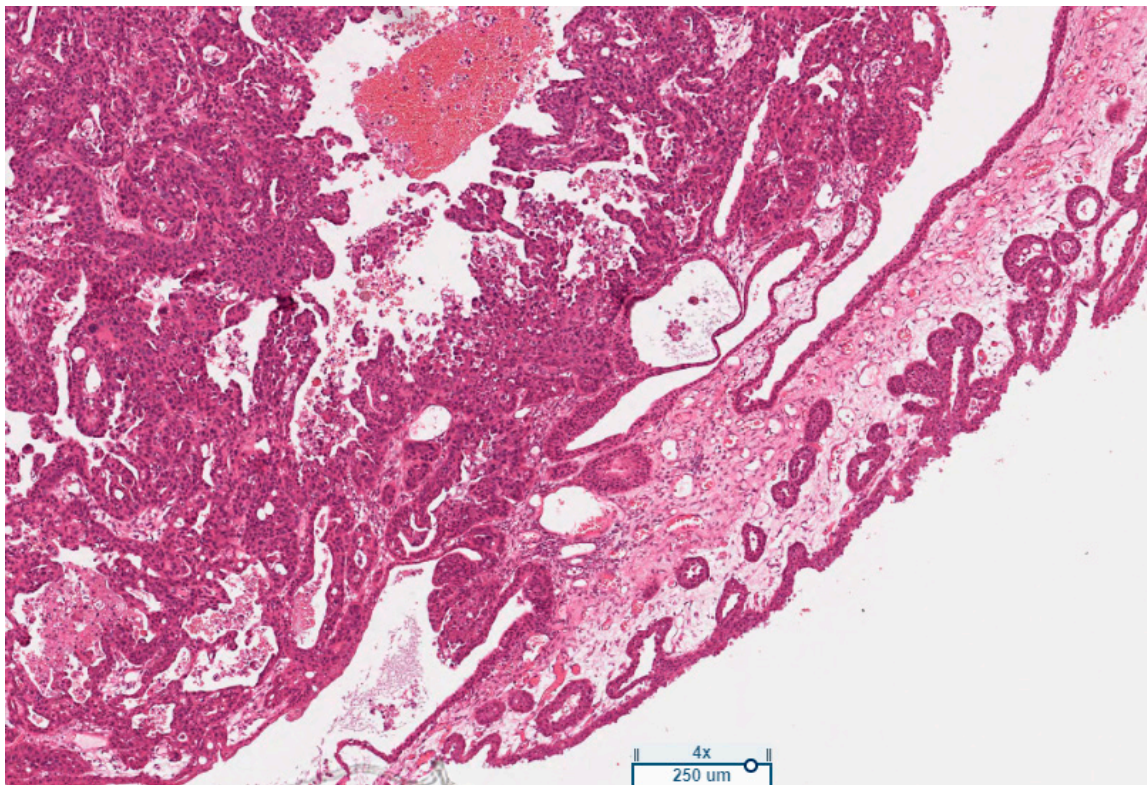

Supplementary Figure S3: A case of bladder neoplasia (urothelial carcinoma) in a cat from the whole slide image case library (40x magnification).

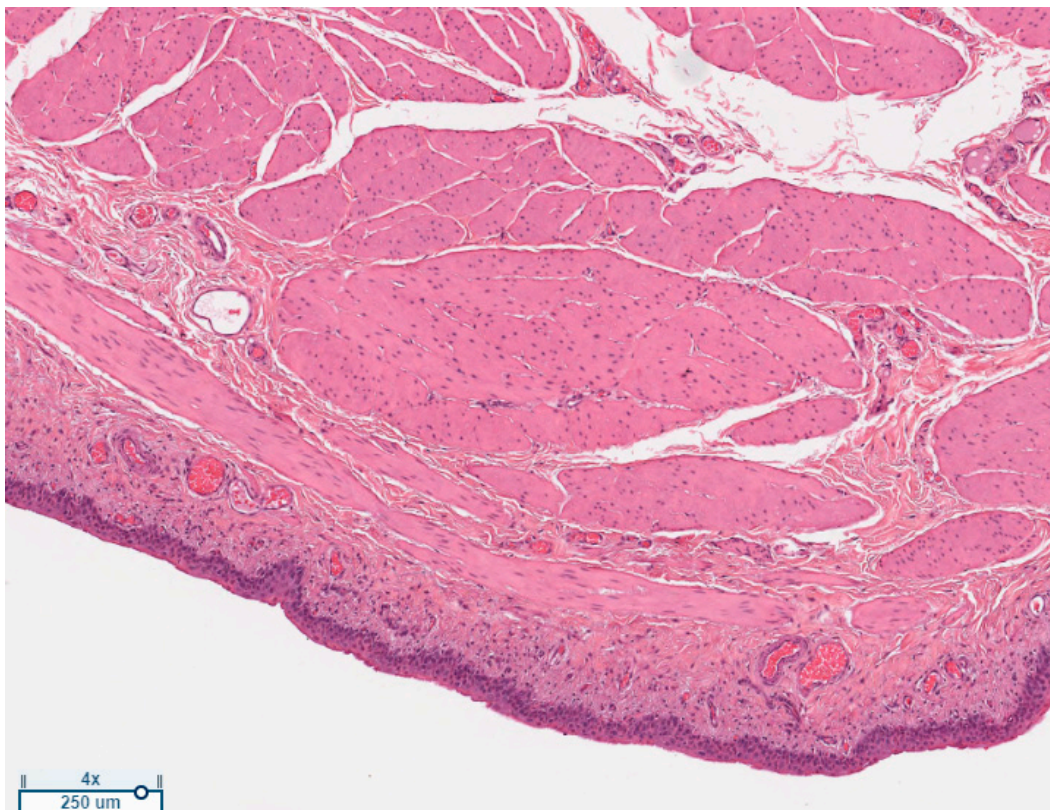

Supplementary Figure S4: A normal canine bladder from the whole slide image case library (40x magnification).
